# Supplementary material for: Towards a reliable measure of motor working memory: revisiting Wu and Coulson's (2014) movement span task
Source: R Soc Open Sci. 2020 Sep 9;7(9):200237. doi: 10.1098/rsos.200237 (PMC7540791; doi:10.1098/rsos.200237)
Supplement: Data: Memory Tasks [file rsos200237supp1.xlsx]

## Sheet: Participant Data
Participant code	MovementSpanSpan	MovementSpanTotal	Age	Gender (M/F)	CorsiForwardTotal	CorsiForwardSpan	CorsiBackwardTotal	CorsiBackwardSpan	ForwardDigitSpan
MMM001	1	14.5	22	F	5	3.5	6	4	4
MMM002	2	13.5	21	F	8	5	10	6	5
MMM003	2	20	21	M	9	5.5	0	0	5
MMM004	2	13.5	27	M	9	5.5	8	5	8
MMM005	2	17.5	19	F	10	6	7	4.5	3
MMM006	1	14	21	F	7	4.5	7	4.5	5
MMM007	1	13	26	M	10	6	10	6	7
MMM008	2	9.5	18	M	8	5	7	4.5	4
MMM009	2	17	18	M	10	6	7	4.5	5
MMM010	2	13.5	20	F	8	5	7	4.5	8
MMM011	2	18	21	M	11	6.5	10	6	7
MMM012	1	12	18	F	7	4.5	6	4	4
MMM013	1.5	17.5	19	F	9	5.5	10	6	5
MMM014	3	18	18	M	5	3.5	3	2.5	6
MMM015	1	14.5	21	F	8	5	6	4	4
MMM016	2	13.5	18	F	8	5	5	3.5	7
MMM017	1	9	27	M	12	7	8	5	6
MMM018	1	14.5	19	F	9	4.5	7	5.5	7
MMM019	1	11.5	20	M	8	5	7	4.5	5
MMM020	4	23	21	M	10	6	5	3.5	5
MMM021	2	18.5	24	M	11	6.5	9	5.5	6
MMM022	2	18	19	F	13	7.5	9	5.5	5
MMM023	2	11.5	22	M	7	4.5	5	3.5	4
MMM024	2	15.5	29	M	9	5.5	10	6	6
MMM025	2	14.5	23	F	8	5	4	3	6
MMM026	2	17	21	F	11	6.5	9	5.5	6
MMM027	2	16	18	M	9	5.5	7	4.5	6
MMM028	3	21.5	19	F	7	4.5	5	3.5	5
MMM029	1	11.5	19	F	6	4	7	4.5	5
MMM030	2	14.5	21	F	9	5.5	7	4.5	8
MMM032	2	11	24	F	8	5	7	4.5	4
MMM033	4	25	19	M	14	8	9	5.5	6
MMM034	2	23	17	F	9	8.5	9	5.5	6
MMM035	2	11	20	M	9	5.5	5	3.5	5
MMM036	2	21	19	M	11	6.5	7	4.5	5
MMM037	2	15	19	M	11	6.5	9	5.5	6
MMM038	2	11	18	F	8	5	6	4	5
MMM039	5	34.5	20	F	13	7.5	9	5.5	5
MMM040	2	12	23	F	9	5.5	7	4.5	5
MMM041	4	25.5	20	M	10	6	10	6	6
MMM042	2	13.5	18	F	12	7	6	4	5
MMM043	1	11	26	F	9	5.5	7	4.5	4
MMM044	2	15	20	M	8	5	7	4.5	6
MMM045	2	16.5	20	F	5	3.5	7	4.5	4
MMM046	2	16.5	21	F	10	6	10	6	5
MMM048	2	16	22	M	7	4.5	6	5	4
MMM049	1	11	19	F	9	5.5	7	4.5	5
MMM050	1	12.5	19	M	11	6.5	7	4.5	5
MMM051	2	13.5	18	F	8	5	9	5.5	6
MMM052	2	16.5	18	F	8	5	7	4.5	4
MMM053	3	20.5	23	F	8	5	6	4	5
MMM054	2	13	20	F	8	5	7	4.5	7
MMM055	2	17	20	F	12	7	7	4.5	7
MMM056	1	14	18	F	11	6.5	6	4	5
MMM057	1	14	17	F	8	5	10	6	2
MMM058	2	17	18	F	9	5.5	8	5	7
MMM059	2	19.5	22	F	9	5.5	7	4.5	8
MMM060	2	12.5	19	M	10	6	9	5.5	5
MMM061	2	18	21	F	9	5.5	8	5	4
MMM062	2	19	21	F	9	5.5	8	5	8
MMM063	2	11	19	F	11	6.5	1	0.5	6
MMM064	2	11.5	20	F	8	5	3	2.5	5
MMM065	2	19.5	18	F	9	5.5	5	3.5	7
MMM066	2	17.5	18	F	8	5	6	4	5
MMM067	2	15.5	22	M	13	7.5	10	6	8
MMM068	2	17.5	19	F	11	6.5	8	5	8
MMM069	2	12	19	M	10	6	7	4.5	6
MMM070	3	19.5	19	F	11	6.5	9	5.5	5
MMM071	3	21	18	F	9	5.5	10	6	5
MMM072	1	12.5	19	F	13	7.5	6	4	8
MMM073	2	13.5	20	F	12	7	9	5.5	7
MMM074	2	18	18	M	12	7	10	6	5
MMM075	1	12	20	F	7	4.5	2	2	8
MMM076	2	20.5	18	F	12	7	7	4.5	5
MMM077	2	11.5	20	M	9	5.5	5	3.5	7
MMM078	1	10	17	M	5	3.5	7	4.5	7
MMM079	1	11	18	M	5	3.5	7	4.5	5
MMM080	2	19	19	M	10	6	10	6	6
MMM081	2	18.5	19	F	11	6.5	9	5.5	4
MMM082	3	21	18	M	9	5.5	6	4	5
MMM083	1	9	18	F	7	4.5	5	3.5	7
MMM084	2	12.5	23	M	7	4.5	8	5	5
MMM085	2	15.5	20	F	7	4.5	7	4.5	7
MMM086	2	11.5	19	M	10	6	7	4.5	5
MMM087	2	11	18	F	9	5.5	6	4	6
MMM088	1	11.5	18	F	9	5.5	2	2	4
MMM089	2	18	18	F	10	6	9	5.5	7
MMM090	1	11.5	21	M	8	5	6	4	6
MMM091	2	19.5	17	F	12	7	8	5	6
MMM092	4	22	18	F	11	6.5	10	6	5
MMM093	3	21	21	M	8	5.5	8	5	5
MMM094	2	14	19	F	11	6.5	9	5.5	7
MMM095	2	17	17	F	8	5	7	4.5	6
MMM096	0.5	15	22	F	9	5.5	6	4	4
MMM097	2	15	20	M	8	5	7	4.5	6
MMM098	2	12.5	19	F	9	5.5	9	5.5	5
MMM099	2	7	19	F	9	5.5	7	4.5	6
MMM100	2	14	19	F	10	6	7	4.5	5
MMM101	1	14.5	20	F	7	4.5	6	4	4
MMM102	2	13.5	23	M	8	5	7	4.5	5
MMM103	2	10.5	18	M	9	5.5	8	5	4
MMM104	0	8.5	19	F	8	5	7	4.5	4
MMM105	2	11.5	19	F	9	5.5	6	4	5
MMM106	2	20.5	18	M	12	7	9	5.5	7
MMM107	1	4.5	18	M	9	5.5	7	4.5	6
MMM108	1	9.5	18	M	9	5.5	7	4.5	7
MMM109	1	5	22	M	9	5.5	10	6	7
MMM110	2	16.5	19	F	9	5.5	10	6	5
MMM111	2	13.5	18	M	11	6.5	3	2.5	7
MMM112	2	15.5	21	M	13	7.5	9	5.5	5
MMM113	2	16.5	20	F	11	6.5	7	4.5	4
MMM114	1	8.5	19	F	8	5	8	5	6
MMM115	1	7.5	18	M	9	5.5	7	4.5	6
MMM116	0	16.5	19	F	8	5	8	5	5
MMM117	1	8.5	18	F	9	5.5	7	4.5	5
MMM118	0.5	6.5	18	M	5	3.5	8	5	5
MMM119	2.5	22.5	19	F	7	4.5	6	4	8
MMM120	1	11	19	F	8	5	7	4.5	4
MMM122	2	12	21	F	10	6	4	5.5	6
MMM123	2	13.5	18	F	9	5.5	7	4.5	5
MMM124	1	8.5	24	F	6	4	5	3.5	6
MMM125	2.5	18.5	19	F	8	5	9	5.5	7
MMM126	0	13.5	17	F	9	5.5	8	5	6
MMM127	2	12	21	F	11	6.5	9	5.5	5
MMM128	1	13	18	F	9	5.5	8	5	5
MMM129	2	9.5	18	F	7	4.5	9	5.5	5
MMM130	1	5	19	F	7	4.5	5	3.5	4
MMM131	1	8.5	18	F	7	4.5	3	2.5	4
MMM132	0.5	9.5	18	M	14	8	10	6	7
MMM133	1	8.5	18	F	10	6	10	6	4
MMM134	2	18	18	M	11	6.5	10	6	7
MMM134B	2	17.5	18	M	10	6	9	5.5	7
MMM135	2	16	22	F	10	6	7	4.5	4
MMM137	2	9.5	18	M	5	3.5	7	4.5	6
MMM139	2	11	18	F	9	5.5	9	5.5	7
MMM140	2	14	18	F	8	5	7	4.5	6
MMM141	1	10	18	M	8	5	7	4	7
MMM142	1	7	21	M	10	6	9	5.5	5
MMM143	0.5	8.5	18	F	10	6	6	4	5
MMM144	2	12	19	M	9	5.5	1	0.5	6
MMM145	2	15	18	F	11	6.5	8	5	6
MMM146	2	11	21	M	11	6.5	10	6	8
MMM147	2	16.5	20	F	9	5.5	8	5	4
MMM148	2	13.5	20	F	12	7	9	5.5	6
MMM149	2	12	20	M	9	5.5	7	4.5	7
MMM150	2	13.5	19	F	10	6	10	6	6
MMM151	2.5	21	22	M	11	6.5	9	5.5	5
MMM152	2	15.5	18	M	10	6	6	4	8
MMM153	1	9	20	M	13	7.5	9	5.5	6
MMM154	1	11	20	F	10	6	1	0.5	6
MMM155	2	15.5	18	F	9	5.5	9	5.5	4
MMM156	2	16.5	20	F	9	5.5	10	6	6
MMM157	1	10.5	22	F	9	5.5	7	4.5	7
MMM158	2	19.5	18	F	10	6	7	4.5	8
MMM159	2	17	18	F	8	5	9	5.5	5
MMM160	2	16	19	F	9	5.5	8	5	6
MMM161	2	12.5	18	F	12	7	10	6	5
MMM162	2.5	18	18	F	10	6	9	5.5	5
MMM163	1	10	18	F	9	5.5	8	5	6
MMM164	1	10	18	F	9	5.5	6	4	7
MMM165	2	21	19	F	9	5.5	8	5	6
MMM166	2	11	22	F	11	6.5	8	5	5
MMM167	0	6	19	M	9	5.5	8	5	4
MMM168	2	8.5	17	F	7	4.5	6	5	5
MMM169	2	13	18	F	9	5.5	7	4.5	7
MMM170	1	7.5	18	F	10	6	5	3.5	4
MMM171	2	14	20	F	7	4.5	5	3.5	7
MMM172	2.5	23	22	M	11	6.5	10	6	8
MMM173	2	15.5	21	M	9	5.5	10	6	5
MMM174	1	6.5	20	F	NA	NA	7	4.5	5
MMM175	1	6.5	20	F	11	6.5	9	5.5	5
MMM176	1	7.5	21	F	10	6	7	4.5	6
MMM177	2	13	18	F	13	7.5	10	6	6
MMM178	2	8	22	F	9	5.5	5	3.5	5
MMM179	2	13	20	M	11	6.5	6	4	5
MMM180	1	10	20	M	9	5.5	10	6	3
MMM181	2	17	19	F	9	5.5	9	5.5	7
MMM182	1	4.5	18	F	7	4.5	8	5	5
MMM183	2	15	19	F	9	5.5	6	4	5
MMM184	2	15.5	21	F	8	5	8	5	6
MMM185	1	14.5	21	F	8	5	8	5	4
MMM186	1	7.5	20	M	11	6.5	6	4	5
MMM188	3	21.5	18	F	11	6.5	10	6	6
MMM189	2	14.5	18	M	9	5.5	6	4	7
MMM190	2	20	22	F	9	5.5	7	4.5	5
